# Supplementary material for: Non-conjugated polyurethane polymer dots based on crosslink enhanced emission (CEE) and application in Fe3+ sensing
Source: Royal Society of Chemistry journal article supplement (doi:10.1039/c6ra17068d), 2016-01-01
Supplement: c6ra17068d1.pdf [file c6ra17068d1.pdf]

**Electronic Supplementary Information (ESI)**

**Non-conjugated polyurethane polymer dots based on crosslink enhanced  
emission (CEE) and application in Fe<sup>3+</sup> sensing**

Dingyi Tong,<sup>a</sup> Wenying Li,<sup>b</sup> Yunxing Zhao,<sup>a,d</sup> Li Zhang,<sup>c</sup> Jian Zheng,<sup>a,d</sup> Tao Cai,<sup>\*a,d</sup> and Shenggao Liu<sup>a,d</sup>

<sup>a</sup> Ningbo Institute of Materials Technology and Engineering, CAS, Ningbo, 315201, P. R. China.

<sup>b</sup> Center for Applied Solid State Chemistry Research, Ningbo University, Ningbo, 315211, P. R. China.

<sup>c</sup> Institute of Theoretical Chemistry, Jilin University, Changchun 130021, P. R. China

<sup>d</sup> University of Chinese Academy of Sciences, Beijing, 100049, P. R. China

E-mail: [caitao@nimte.ac.cn](mailto:caitao@nimte.ac.cn); Tel: +86-574-86324663

**CONTENTS**

1. Material & Instrumentation
2. Synthesis of Hexahydro-1,3,5-tris(hydroxyethyl)-s-triazine (HTHT)
3. Synthesis of Hyperbranched polyurethanes (HPUs-Tx)
4. Synthesis of Hyperbranched polyurethanes (HPUs-T0)
5. Emission spectra of HPUs-T15 in DMSO / H<sub>2</sub>O mixture (Fig. S1)
6. Emission spectra and size distribution histogram of HPUs-Tx in 10%DMSO / 90%H<sub>2</sub>O mixture (Fig. S2)
7. <sup>1</sup>H NMR spectra of HTHT (Fig. S3)
8. <sup>1</sup>H NMR spectra of HPUs-T15 (Fig. S4)
9. Fluorescence quantum yield (Φ) of HTT and HPUs-Tx (Table S1)
10. Photo of HPUs-Tx in pH = 1 and 2 (Fig. S5)
11. Mechanism of the polymer based on non-conjugated triazine ring in pH < 2 (Scheme. S1)
12. Mechanism of NCPDs vs Fe<sup>3+</sup> (Scheme. S2)
13. MS spectra of NCPDs, NCPDs-Fe<sup>3+</sup> and NCPDs in pH=1 (Fig. S6)
14. UV absorption spectra of NCPDs, Fe<sup>3+</sup> and NCPDs-Fe<sup>3+</sup> (Fig. S7)
15. Fluorescence lifetime spectra of NCPDs and NCPDs-Fe<sup>3+</sup> (Fig. S8)
16. Emission spectra of NCPDs, NCPDs-Fe<sup>3+</sup> and NCPDs-Fe<sup>3+</sup>-EDTA (Fig. S9)
17. <sup>1</sup>H NMR spectra of NCPDs and NCPDs-Fe<sup>3+</sup> (Fig. S10)

## Material & Instrumentation

Paraformaldehyde was purchased from Sinopharm (China). 2-Aminoethanol and Triethylene glycol monomethyl ether (TGME) were purchased from Aladdin (China). Dibutyltin dilaurate was purchased from Energy-Chemical (China). Dicyclohexylmethane 4, 4'-Diisocyanate (HMDI) was purchased from TCI. All other common reagents and solvent were received from commercial sources and used without further purification. The pure water was measured with a DDSJ-308F conductometer (Shanghai INESA Instrument) at 25 °C.

NMR spectra were measured in DMSO-*d*<sub>6</sub> on Bruker-Avance (400 MHz for <sup>1</sup>H and 101 MHz for <sup>13</sup>C) with TMS as an internal reference. Fourier transform infrared (FTIR) Spectroscopy (Nicolet 6700, ThermoScientific, USA): The spectra were measured with a spectrometer. Absorbance spectra were collected using a spectral resolution of 4 cm<sup>-1</sup> at room temperature over a frequency range of 4000-500 cm<sup>-1</sup>. The background spectra were recorded on corresponding KBr. The microstructure was observed by Transmission electron microscope (TEM, JEOL2100 HR, Japan). Thermogravimetric analysis (TGA) was carried out on a METTLER TOLEDO-TGA/DSC I instrument with a heating rate of 10°C min<sup>-1</sup> in flowing N<sub>2</sub> and a sample of 3-5 mg. Size distribution histogram was obtained using Malvern Nano ZS. UV-vis absorption spectra of the samples were recorded using a Lambda 950 spectrophotometer (Perkin-Elmer). All the fluorescence measurements were acquired on a Hitachi F4600 and Edinburgh Instrument FLS920.

## Synthesis of Hexahydro-1,3,5-tris(hydroxyethyl)-s-triazine (HTHT)

Hexahydro-1,3,5-tris(hydroxyethyl)-s-triazazine was synthesized according to the literature method.<sup>1</sup>

<sup>1</sup>H NMR (400 MHz, DMSO) δ 4.56 (s, 3H), 3.50-3.10 (br, 6H), 3.43 (m, 12H), 3.37 (t, J = 4.8 Hz, 6H), 2.53 (t, J = 5.6 Hz, 6H). <sup>13</sup>C NMR (101 MHz, DMSO) δ 74.85, 72.60, 69.52, 60.70, 52.05.

## Synthesis of Hyperbranched polyurethanes (HPUs-Tx)

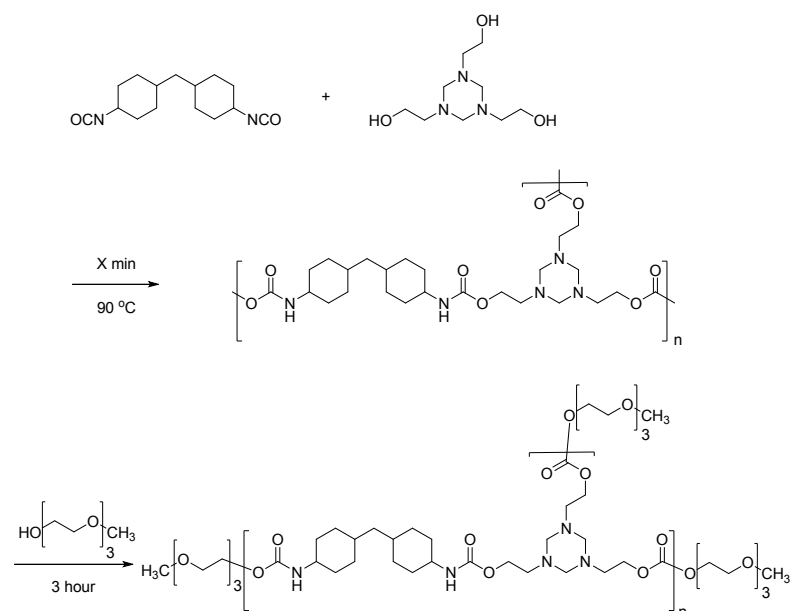

Hyperbranched polyurethanes (HPUs) were prepared by a two-step procedure in a N<sub>2</sub> atmosphere at 90°C with 0.5% w/w Dibutyltin dilaurate as a catalyzer. In the first step, 1 mmol HTHT and the catalyzer were dissolved in 15 mL ethylenedichloride. Next, the solution was mixed with 2 mmol HMDI, stirred by 400 rpm and heated slowly to 90°C in order to form the cores of polymer dots. In the second stage, after continuing stirring for X min (X = 1, 5,

10, 15, 20), an excess of TGME (3 mL) was added into the reaction and stirred for 3 hours to block the polymer generally. In the end, the mixture was cooled at room temperature and precipitated from ether. The resulting precipitate was filtered, washed with water and dried in vacuo to give a yellow gel **HPUs-T<sub>X</sub>** (X = 1, 5, 10, 15, 20): **HPUs-T<sub>1</sub>** 1.04 g; **HPUs-T<sub>5</sub>** 1.25 g; **HPUs-T<sub>10</sub>** 1.40 g; **HPUs-T<sub>15</sub>** 1.39 g; **HPUs-T<sub>20</sub>** 1.35 g.

## Synthesis of Hyperbranched polyurethanes (**HPUs-T<sub>0</sub>**)

This **HPUs-T<sub>0</sub>** was synthesized according to the **HPUs-T<sub>X</sub>** method. In the second stage, after continuing stirring for 15 min, an excess of methanol (3 mL) was added into the reaction and stirred for 3 hours: **HPUs-T<sub>0</sub>** 0.92 g.

(1) (a) J. M. Bakke, J. Buhaug and J. Riha, *Ind. Eng. Chem. Res.*, 2001, **40**, 6051; (b) G. O. Jones, J. M. Garcia, H. W. Horn and J. L. Hedrick, *Org. Lett.*, 2014, **16**, 5502.

### Emission spectra of **HPUs-T<sub>15</sub>** in DMSO / H<sub>2</sub>O mixture

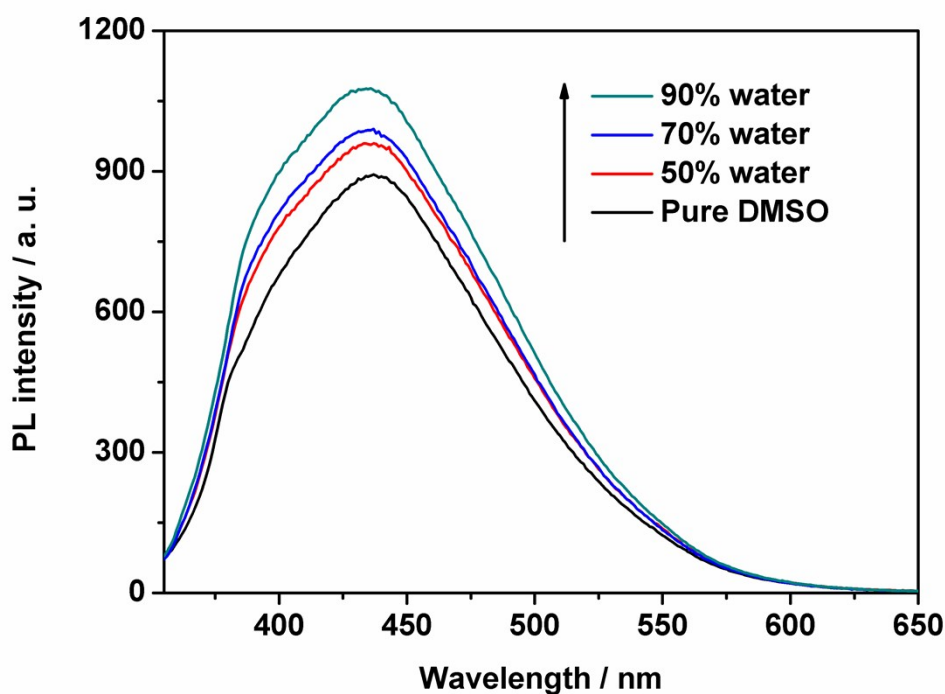

Fig. S1 Emission spectra of the **HPUs-T<sub>15</sub>** (0.5 mg/mL) in DMSO and 50~90 % water in DMSO.

## Emission spectra and size distribution histogram of HPUs-Tx in 10%DMSO / 90%H<sub>2</sub>O mixture

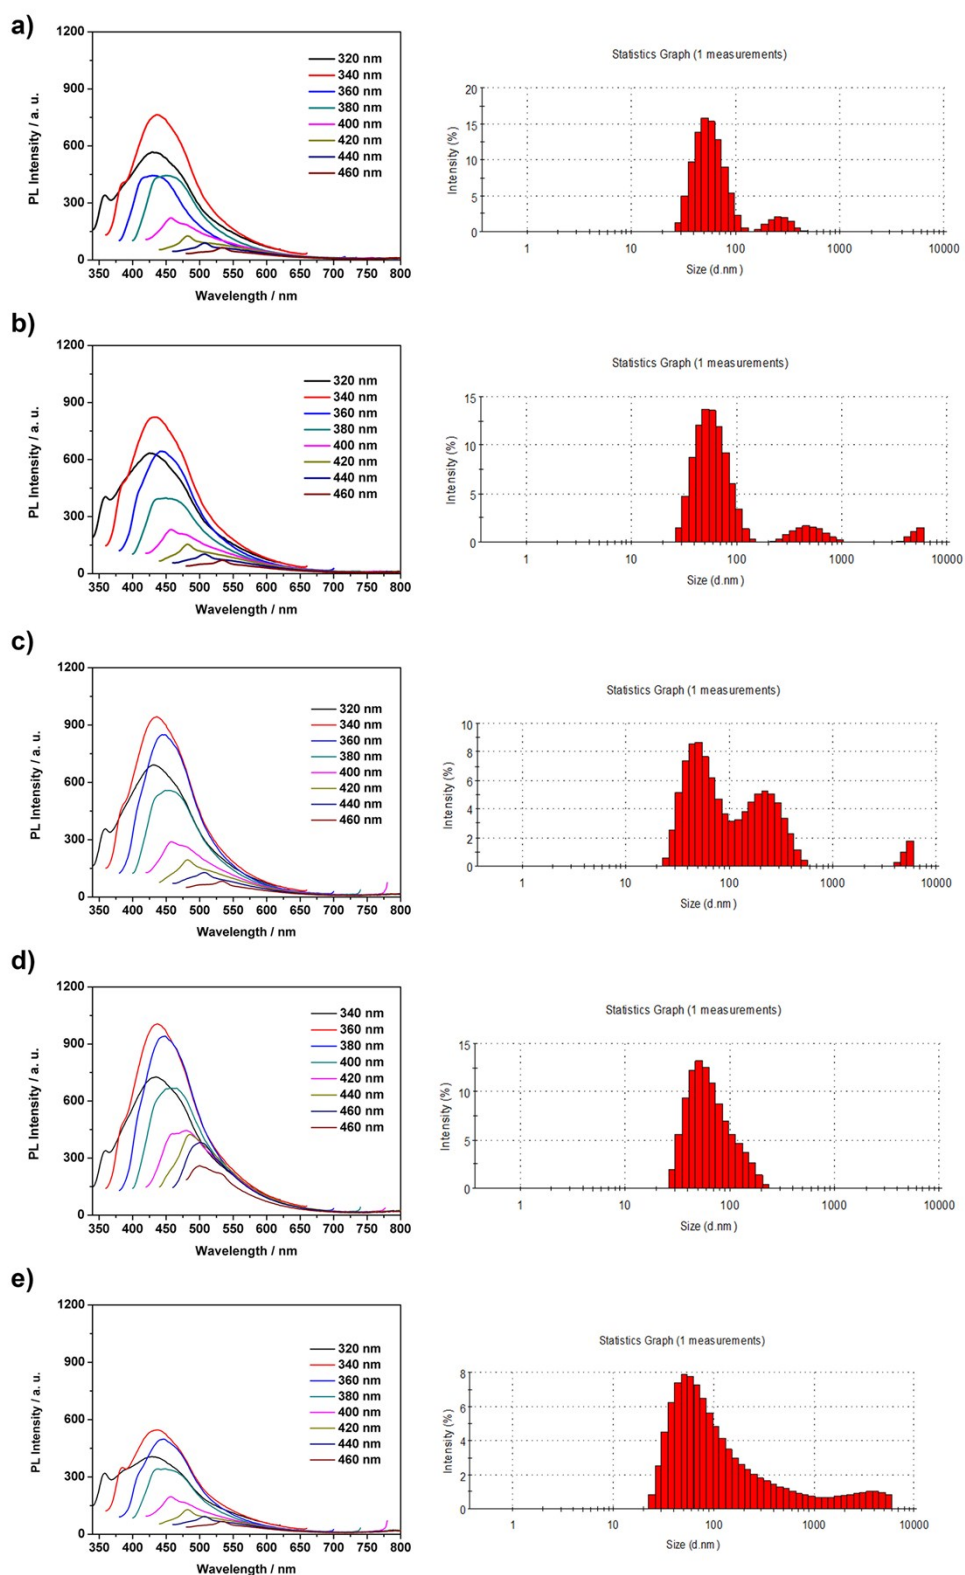

**Fig. S2** Emission spectra (left) and size distribution histogram (right) of NCPDs by HPUs-Tx (0.5 mg/mL) in DMSO–H<sub>2</sub>O (10 mM) (1:9, v/v): (a) HPUs-T1; (b) HPUs-T5; (c) HPUs-T10; (d) HPUs-T15; (e) HPUs-T20.

## $^1\text{H}$ NMR spectra of HTHT

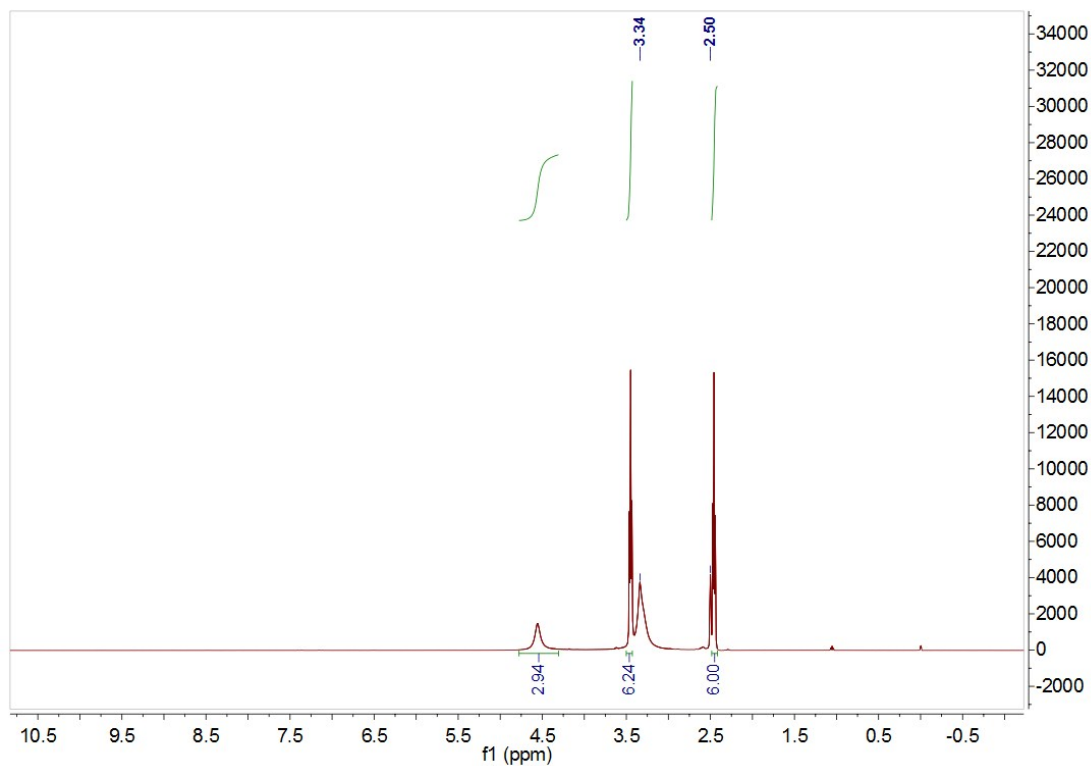

Fig. S3  $^1\text{H}$  NMR spectra of HTHT.

## $^1\text{H}$ NMR spectra of HPUs-T15

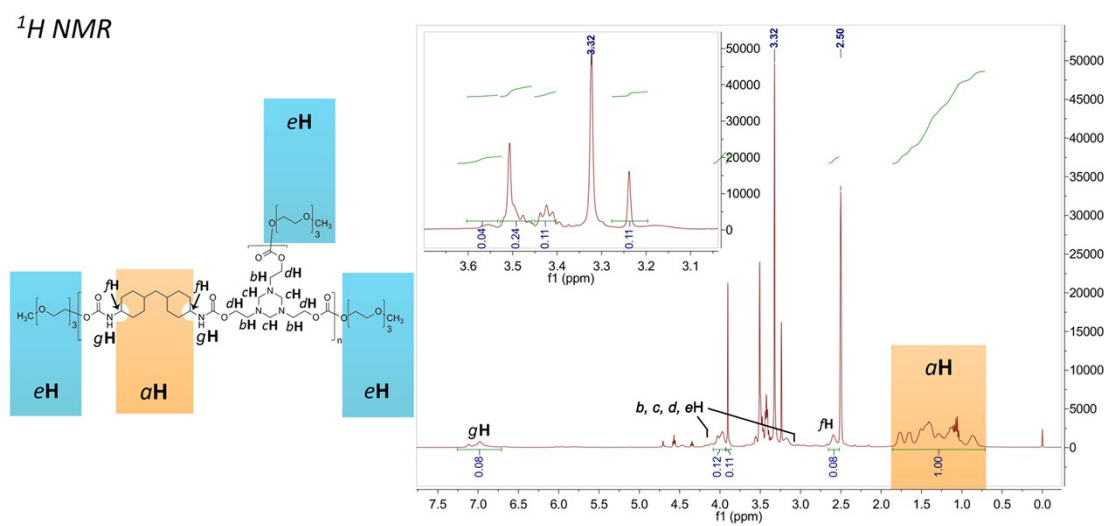

Fig. S4  $^1\text{H}$  NMR spectra of HPUs-T15.

## Fluorescence quantum yield ( $\Phi$ ) of HTHT and HPUs-Tx

| No. | Compound | Fluorescence quantum yield <sup>a</sup> $\Phi$ (%) |                           |
|-----|----------|----------------------------------------------------|---------------------------|
|     |          | DMSO                                               | DMSO:H <sub>2</sub> O=1:9 |
| 0   | HTHT     | 0.0                                                | 0.0                       |
| 1   | HPUs-T1  | 1.4                                                | 1.6                       |
| 2   | HPUs-T5  | 1.5                                                | 1.8                       |
| 3   | HPUs-T10 | 2.0                                                | 2.2                       |
| 4   | HPUs-T15 | 2.1                                                | 2.2                       |
| 5   | HPUs-T20 | 1.1                                                | 1.3                       |

**Table. S1** <sup>a</sup>Quinine sulphate was used as standard whose quantum yield is 0.63 in 0.1N H<sub>2</sub>SO<sub>4</sub> at  $\lambda_{\text{ex}}$ = 340 nm

## Photo of HPUs-Tx in pH = 1 and 2

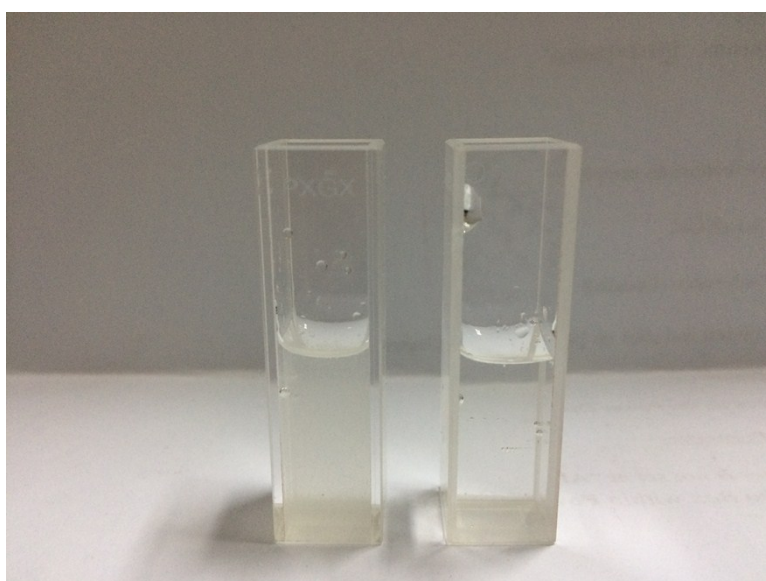

**Fig. S5** Photo of the HPUs-T15 (0.5 mg/mL) in DMSO–H<sub>2</sub>O (10 mM) (1:9, v/v): (left) pH = 1; (right) pH = 2.

## Mechanism of the polymer based on non-conjugated triazine ring in pH < 2

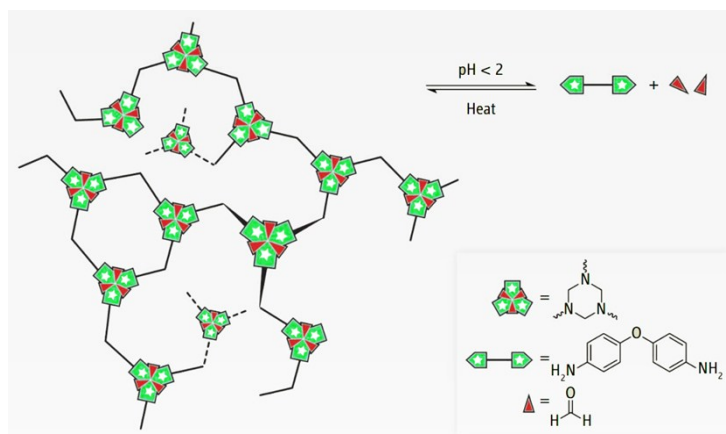

**Scheme. S1** Mechanism<sup>2</sup> of the polymer based on non-conjugated triazine ring in pH < 2  
(2) T. E. Long, *Science*, 2014, **344**, 706.

## Mechanism of NCPDs vs Fe<sup>3+</sup>

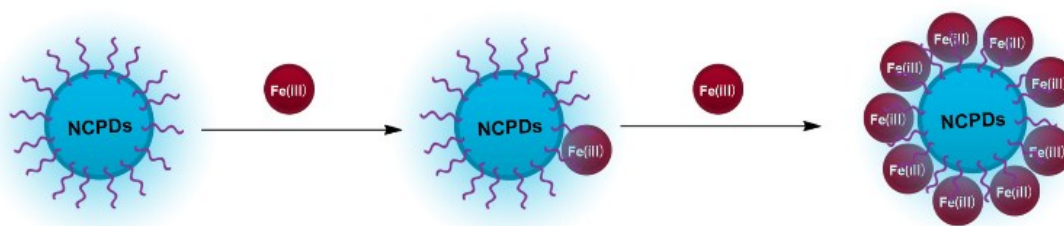

**Scheme. S2** The mechanism of NCPDs vs Fe<sup>3+</sup>.

## MS spectra of NCPDs, NCPDs-Fe<sup>3+</sup> and NCPDs in pH=1

a) NCPDs

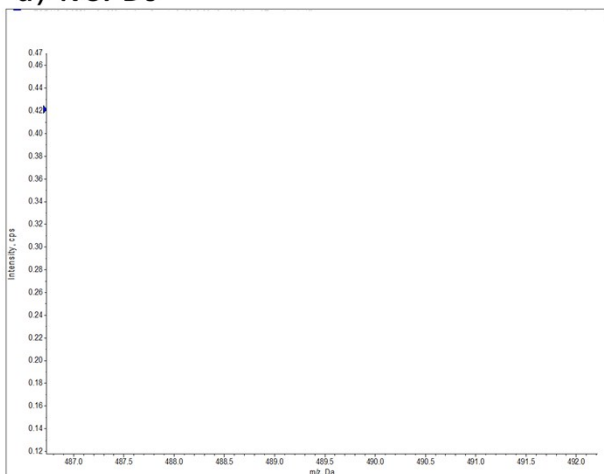

b) NCPDs-Fe(III)

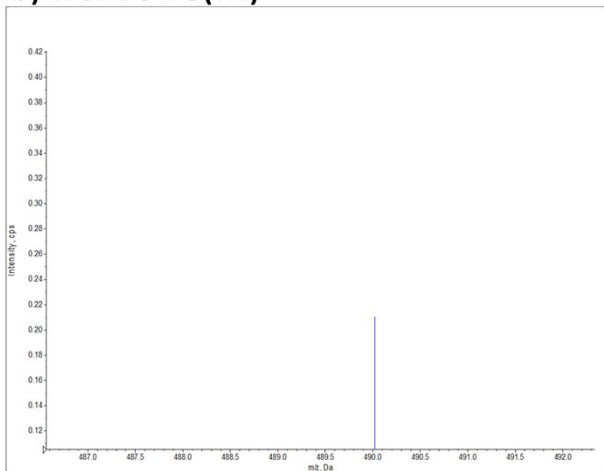

c) NCPDs in pH=1

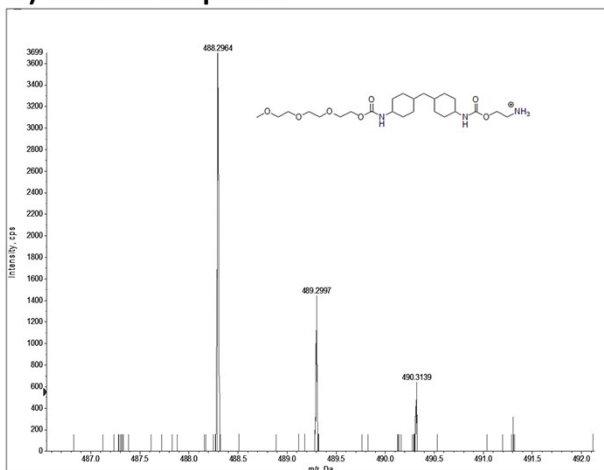

**Fig. S6** MS spectra of (a) **HPUs-T15** (0.5 mg/mL) in DMSO–PBS buffer (10 mM) (pH=7.4, 1:9, v/v); (b) **HPUs-T15** (0.5 mg/mL) by alternating addition of 100  $\mu$ M Fe<sup>3+</sup> in DMSO–PBS buffer (10 mM) (pH=7.4, 1:9, v/v); (c) **HPUs-T15** (0.5 mg/mL) in DMSO–HCl(aq) (pH=1.0, 1:9, v/v)



## UV absorption spectra of NCPDs, Fe<sup>3+</sup> and NCPDs-Fe<sup>3+</sup>

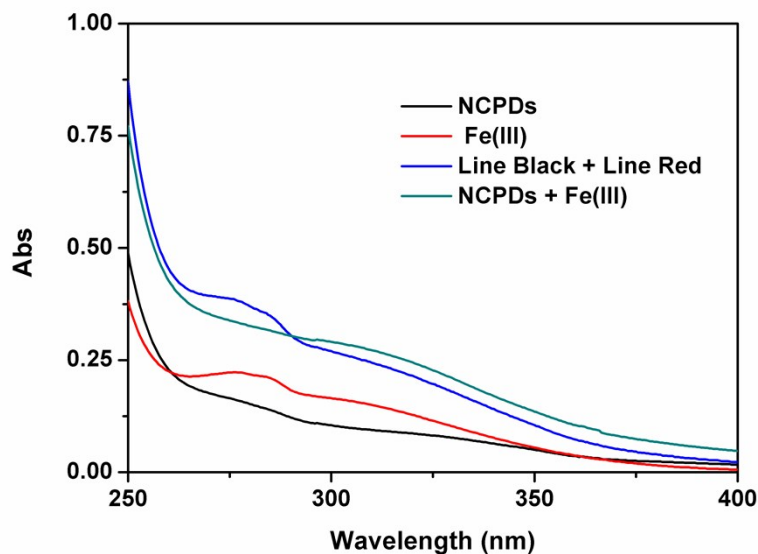

Fig. S7 UV absorption spectra of 0.5 mg/mL NCPDs , 100  $\mu$ M Fe<sup>3+</sup> and 0.5 mg/mL NCPDs + 100  $\mu$ M Fe<sup>3+</sup>, in DMSO-PBS buffer (pH=7.4, 1:9, v/v).

## Fluorescence lifetime spectra of NCPDs and NCPDs-Fe<sup>3+</sup>

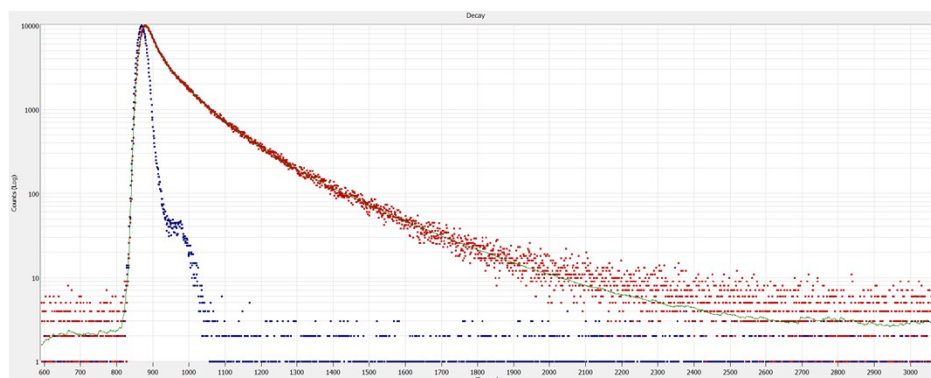

$$\tau(\text{NCPDs}) = 2.54239 \text{ ns}$$

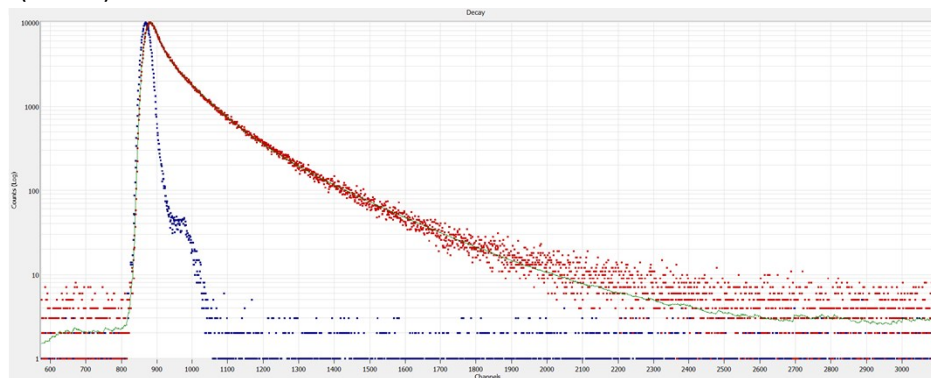

$$\tau(\text{NCPDs} + \text{Fe}^{3+}) = 2.51154 \text{ ns}$$

Fig. S8 Fluorescence lifetime spectra of NCPDs, NCPDs + Fe<sup>3+</sup>, in DMSO-PBS buffer (pH=7.4, 1:9, v/v).

## Emission spectra of NCPDs, NCPDs-Fe<sup>3+</sup> and NCPDs-Fe<sup>3+</sup>-EDTA

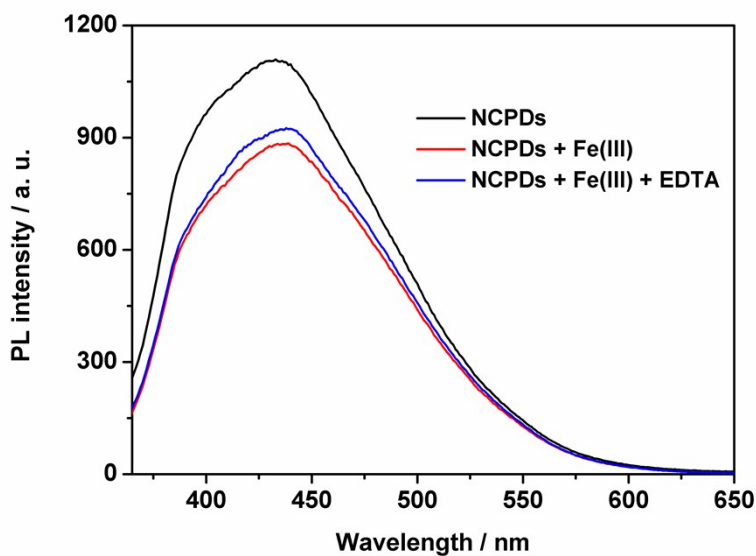

Fig. S9 Emission spectra of the HPU<sub>s</sub>-T15 (0.5 mg/mL) in DMSO–PBS buffer (10 mM) (pH=7.4, 1:9, v/v) by addition of (black line) none; (b) 50  $\mu\text{M}$  Fe<sup>3+</sup>; (c) 50  $\mu\text{M}$  Fe<sup>3+</sup> and then 50  $\mu\text{M}$  EDTA.

## <sup>1</sup>H NMR spectra of NCPDs and NCPDs-Fe<sup>3+</sup>

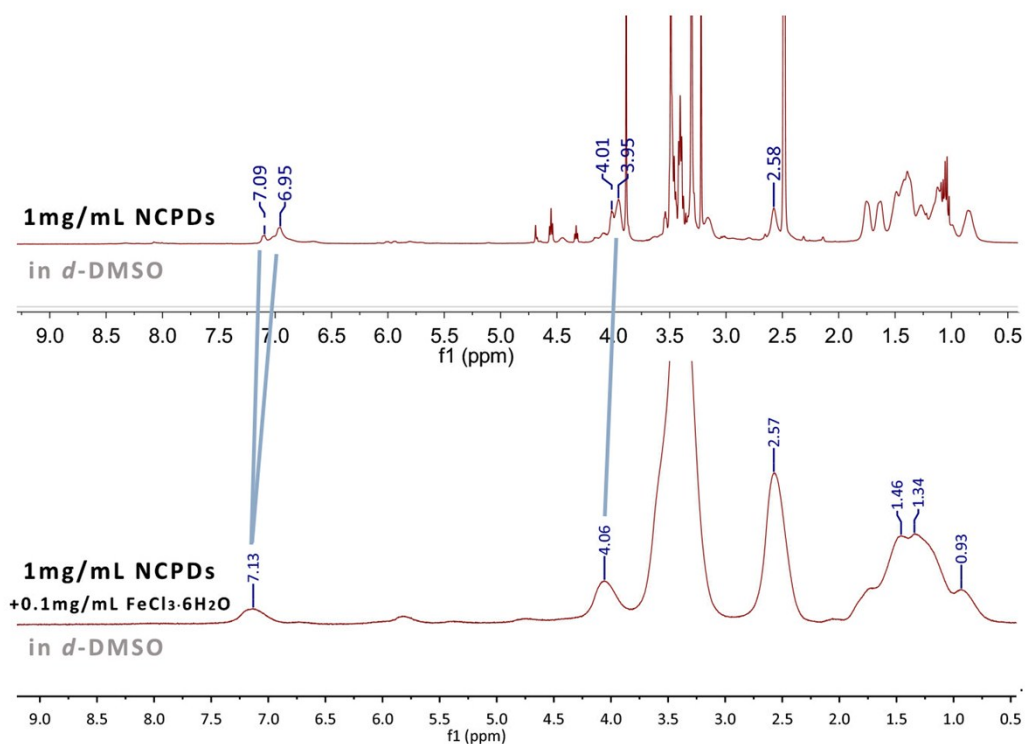

Fig. S10 <sup>1</sup>H NMR spectra of NCPDs and NCPDs + Fe<sup>3+</sup> in *d*-DMSO.
